# Supplementary material for: A High-Performance Liquid Chromatography with Photodiode Array Detection Method for Simultaneous Determination of Three Compounds Isolated from Wikstroemia ganpi: Assessment of the Effects on Cytochrome P450-Mediated Metabolism In Vitro and In Vivo
Source: MDPI journal article supplement (doi:10.3390/nu15184061), 2023-09-19
Supplement: s1 [file s1]

*Supporting Information*

**A High-Performance Liquid Chromatography with Photodiode Array Detection Method for Simultaneous Determination of Three Compounds Isolated from Wikstroemia ganpi: Assessment of the Effects on Cytochrome P450-Mediated Metabolism In Vitro and In Vivo**

Min-Ji Keem <sup>1,2,†</sup>, Seong-Wook Seo <sup>2,3,†</sup>, Taeyoung Kim <sup>2,3</sup>, Beom-Geun Jo <sup>1,2</sup>, Su-Nam Kim <sup>4</sup>, In-Soo Yoon <sup>2,3,\*</sup> and Min Hye Yang <sup>1,2,\*</sup>

<sup>1</sup> Department of Pharmacy, College of Pharmacy, Pusan National University, Busan 46241, Republic of Korea; mj\_keem@pusan.ac.kr (M.-J.K.); bg\_jo@pusan.ac.kr (B.-G.J.)

<sup>2</sup> Research Institute for Drug Development, Pusan National University, Busan 46241, Republic of Korea; mj\_keem@pusan.ac.kr (M.-J.K.); sswook@pusan.ac.kr (S.-W.S.); taeyk@pusan.ac.kr (T.K.); bg\_jo@pusan.ac.kr (B.-G.J.)

<sup>3</sup> Department of Manufacturing Pharmacy, College of Pharmacy, Pusan National University, Busan 46241, Republic of Korea; sswook@pusan.ac.kr (S.-W.S.); taeyk@pusan.ac.kr (T.K.)

<sup>4</sup> Natural Products Research Institute, Korea Institute of Science and Technology, Gangneung 25451, Republic of Korea; snkim@kist.re.kr (S.-N.K.)

\* Correspondence: insoo.yoon@pusan.ac.kr (I.-S.Y.); mhyang@pusan.ac.kr (M.H.Y.)

† These authors contributed equally to this work.

## Materials and Methods

### *UPLC-MS/MS Conditions*

A Shimadzu UPLC-MS/MS system consisting of a pump (LC-30AD), an autosampler (SIL-30AC), a column oven (CTO-20AC), and a mass detector (LCMS-8050) was used (Shimadzu Co.). Liquid chromatographic separation of BUS, DEX, DIC and IS (internal standard; alpelisib 5 ng/mL) was conducted using a Poroshell 120 EC-C<sub>18</sub> column (100 × 2.1 mm, 2.7 μm; Agilent) protected by a C<sub>18</sub> guard column (SecurityGuard ULTRA; Phenomenex). Gradient elution of the mobile phase, consisting of 0.1% formic acid in deionized water (DIW; solvent A) and acetonitrile (solvent B), was performed at a flow rate of 0.3 mL/min at 40°C. The procedure was as follows (solvent A:solvent B, v/v): starting at 95:5 for 0 min, ramping from 95:5 to 15:85 for 3 min, ramping from 15:85 to 0:100 for 3 min, maintained at 0:100 for 1 min, returning to 95:5 for 0.01 min, and maintained at 95:5 min for 2.99 min (hence, the total run time was 10 min). The ion source parameters were set as follows: nebulizing gas flow, 3 L/min; drying gas flow, 10 L/min; heating gas flow, 10 L/min; interface temperature, 300°C; desolvation temperature, 250°C; and heating block temperature, 400°C. Signals of the precursor [M+H]<sup>+</sup> ion peaks were observed at *m/z* 386.20, 272.30, 297.65, and 442.10 for BUS, DEX, DIC, and IS, respectively. These precursor ions are further fragmented into product ions. The most abundant product ions were observed at *m/z* 122.15, 215.15, 214.15, and 328.00 for BUS, DEX, DIC, and IS. The optimized LC-MS/MS conditions resulted in retention times of 2.229, 2.321, 3.437, and 2.794 min for BUS, DEX, DIC, and IS.

### *Biological Sample Preparation*

A measure of 50 μL of each biological sample, such as plasma, or S9 fraction, was

deproteinized with 200  $\mu$ L of acetonitrile containing 5 ng/mL IS, vortex mixed for 5 min, and centrifuged at  $16,000 \times g$  for 10 min at 4°C. Then, 200  $\mu$ L of the supernatant was collected, dried under vacuum using a SpeedVac (Eyela), reconstituted with 60  $\mu$ L MeOH, and injected into the UPLC-MS/MS system.
